# Supplementary material
Source: Springer Nature journal article supplement (https://www.springermedizin.de/resource/supplementary/12913_2011_2022_MOESM4_ESM.pdf/9529620)
Supplement: MOESM4 [file 9529620]

Yield of search and bibliography  
cross reference

n=460

Excluded 116, non-relevant title\abstract

Studies reviewed in full text

n=344

Excluded 217, no definition of preventable harm

Potentially appropriate studies to be  
included in the systematic review

n=127
